# Supplementary material for: Risk factors for in-hospital mortality in laboratory-confirmed COVID-19 patients in the Netherlands: A competing risk survival analysis
Source: PubMed Central journal article supplement (PMC7997038; doi:10.1371/journal.pone.0249231), 2021-03-26

S2 Fig. Schoenfeld residuals plots

A. Plots of the Schoenfeld residuals for the multivariable CSH model for death.

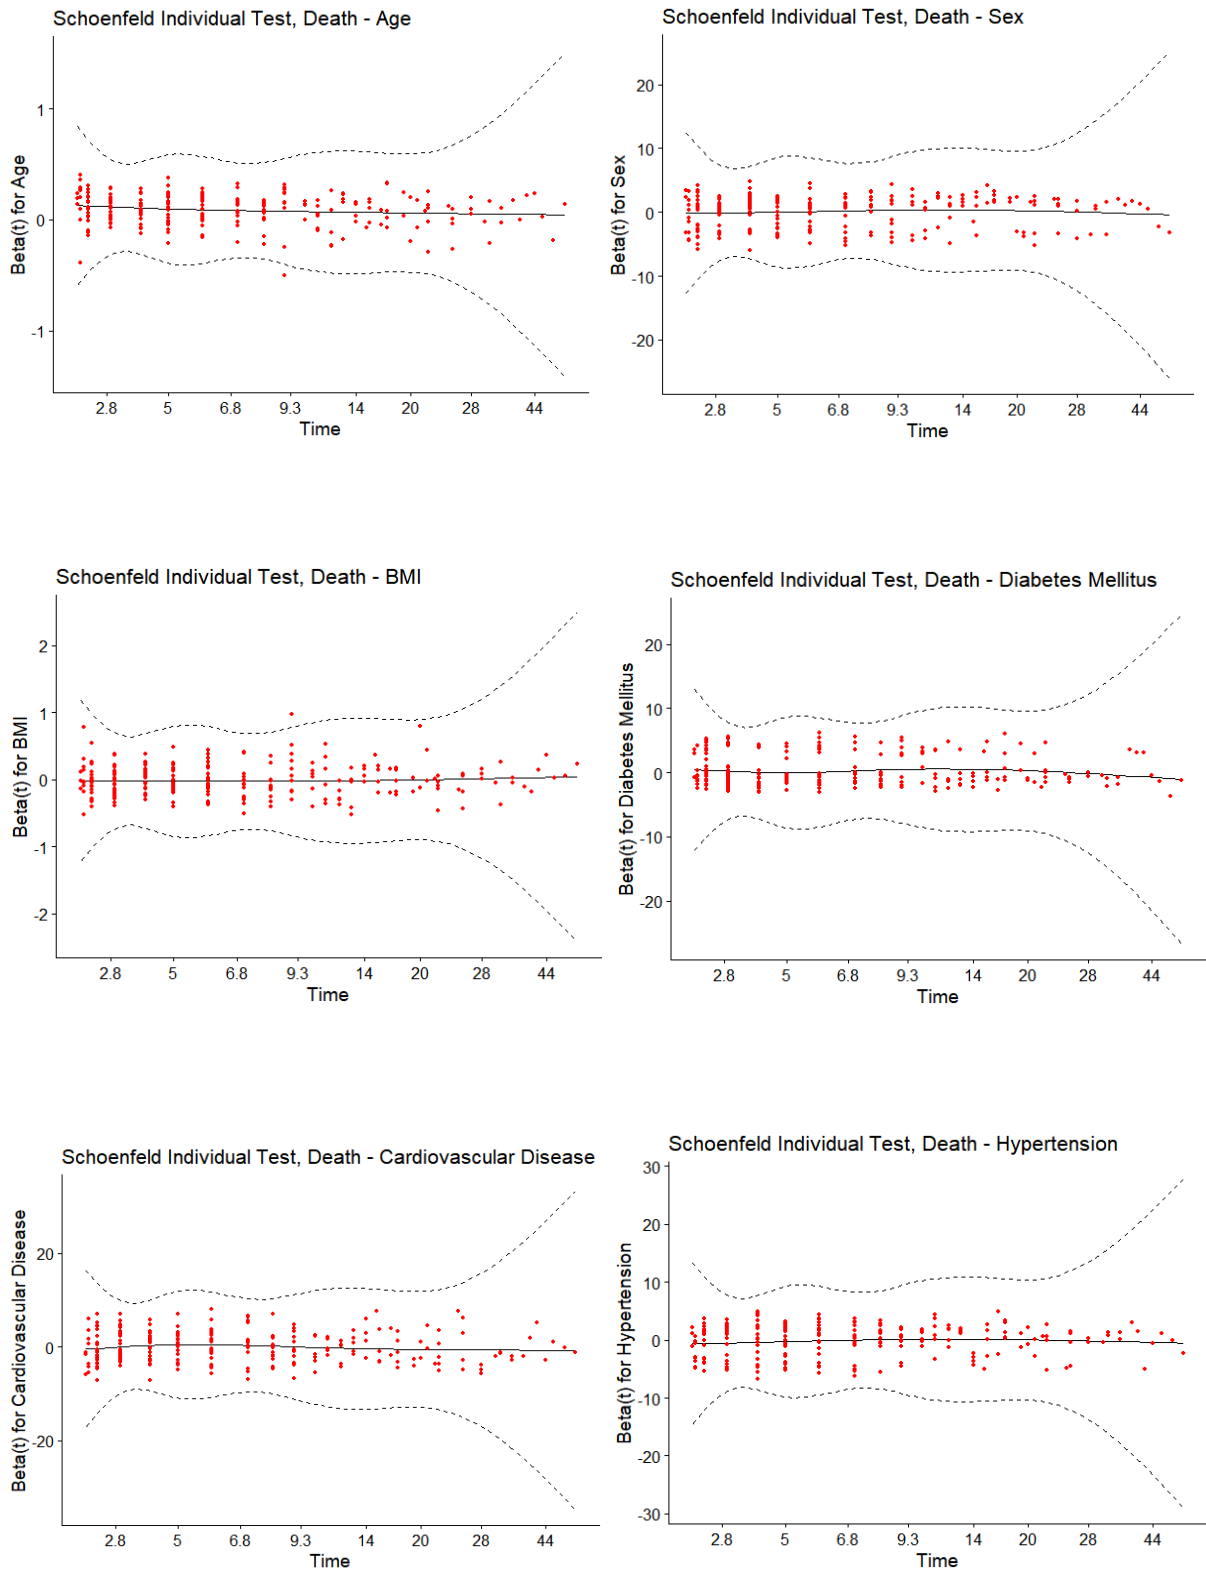

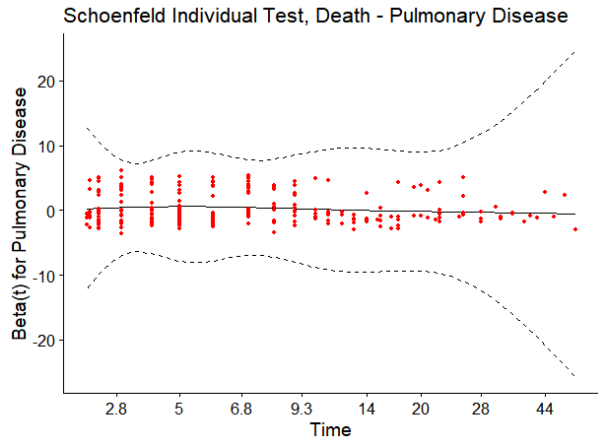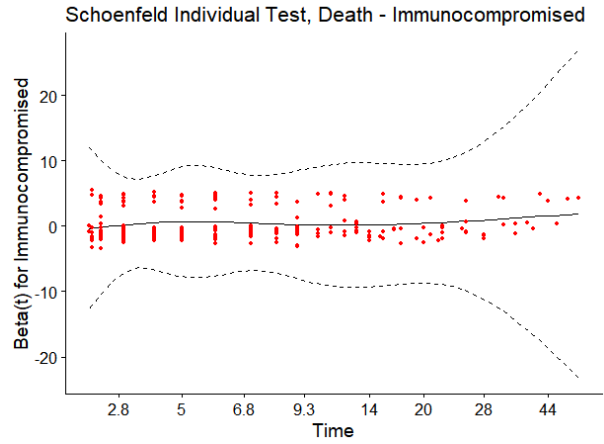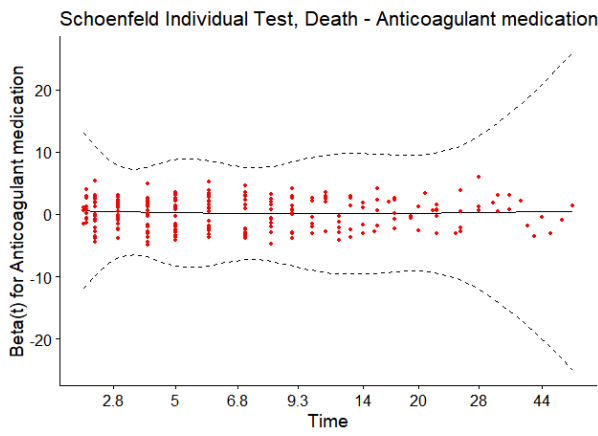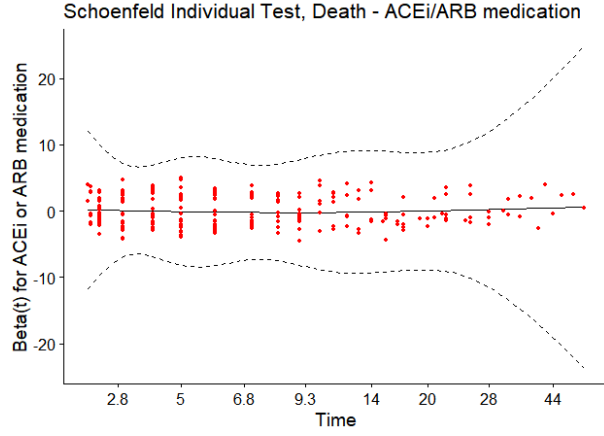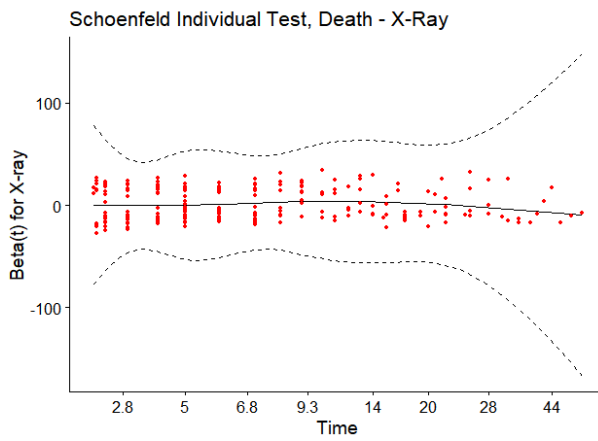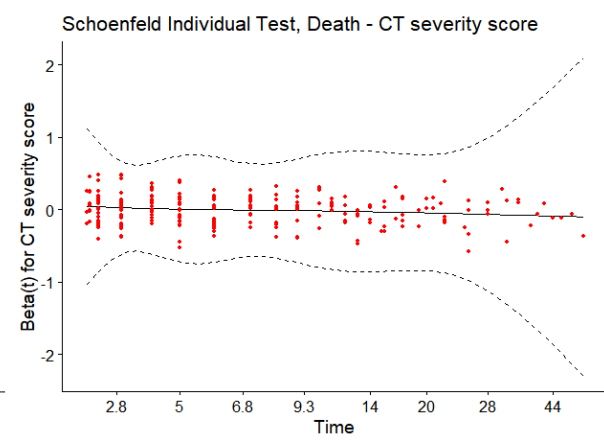

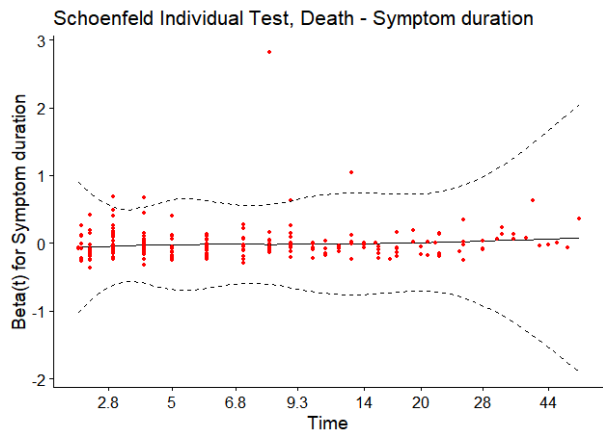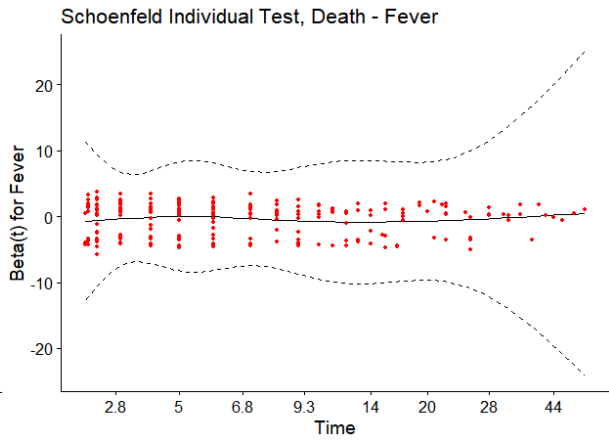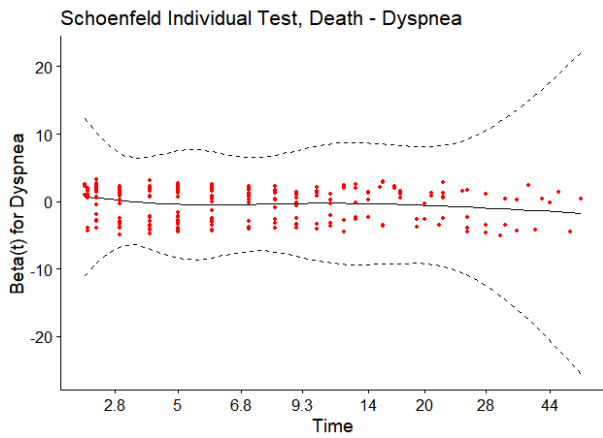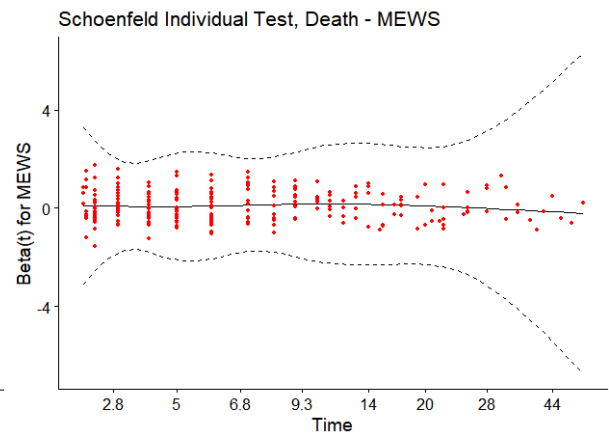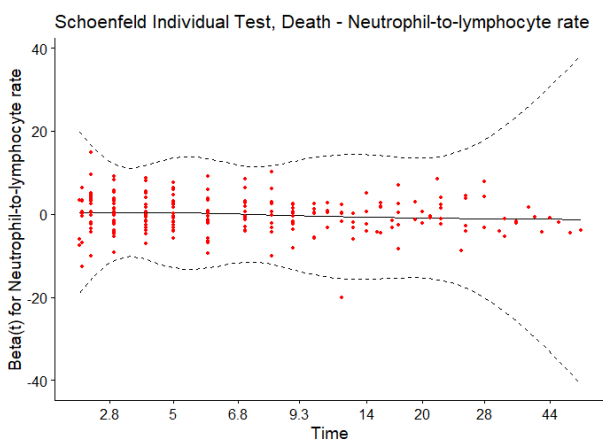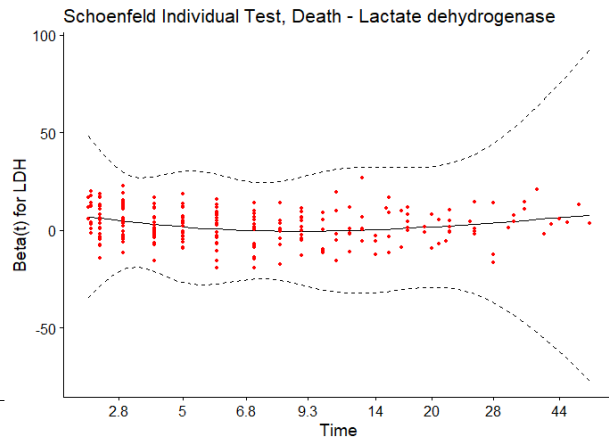

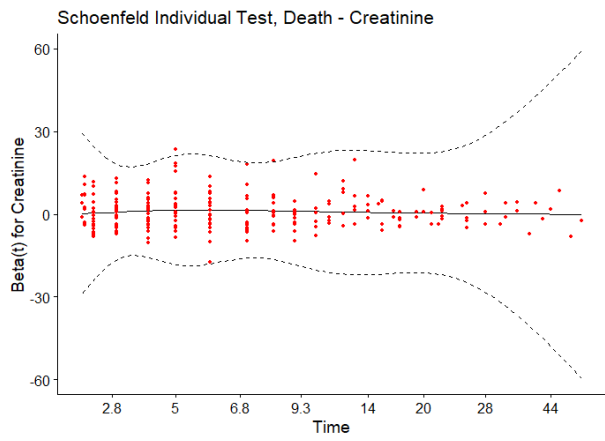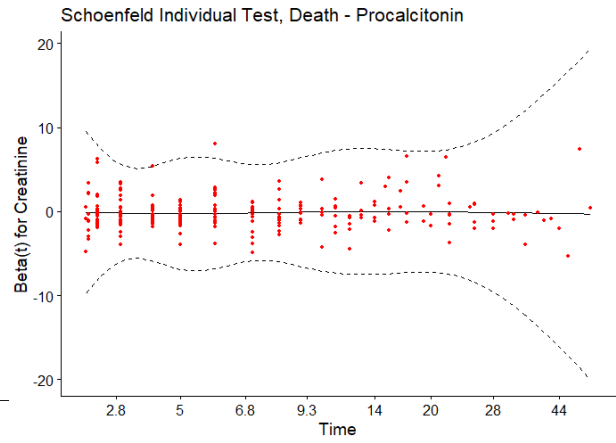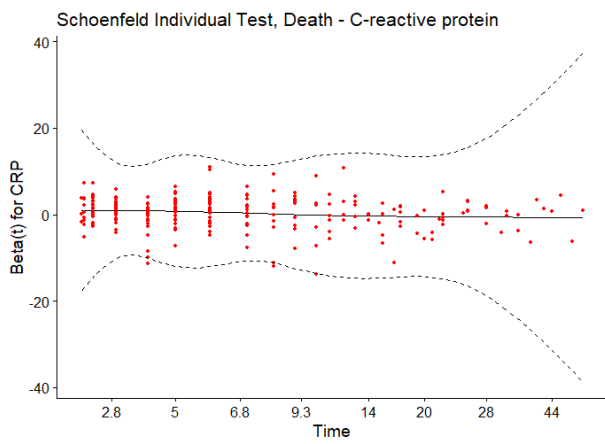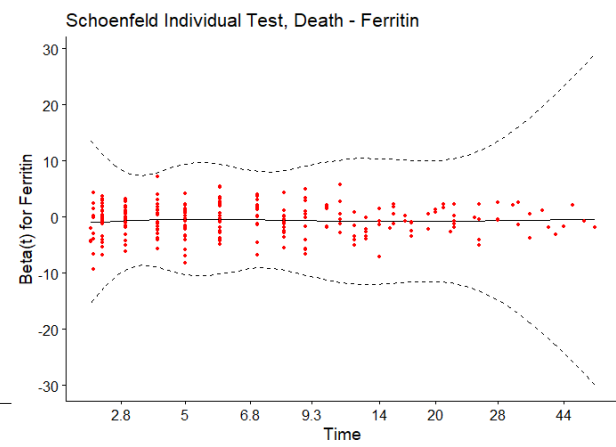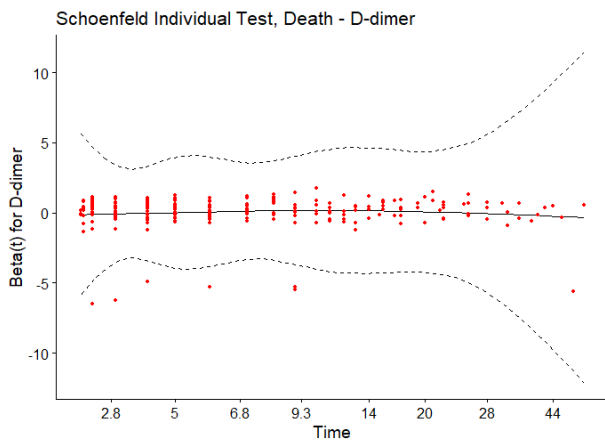

**B. Plots of the Schoenfeld residuals for the multivariable CSH model for recovery.**

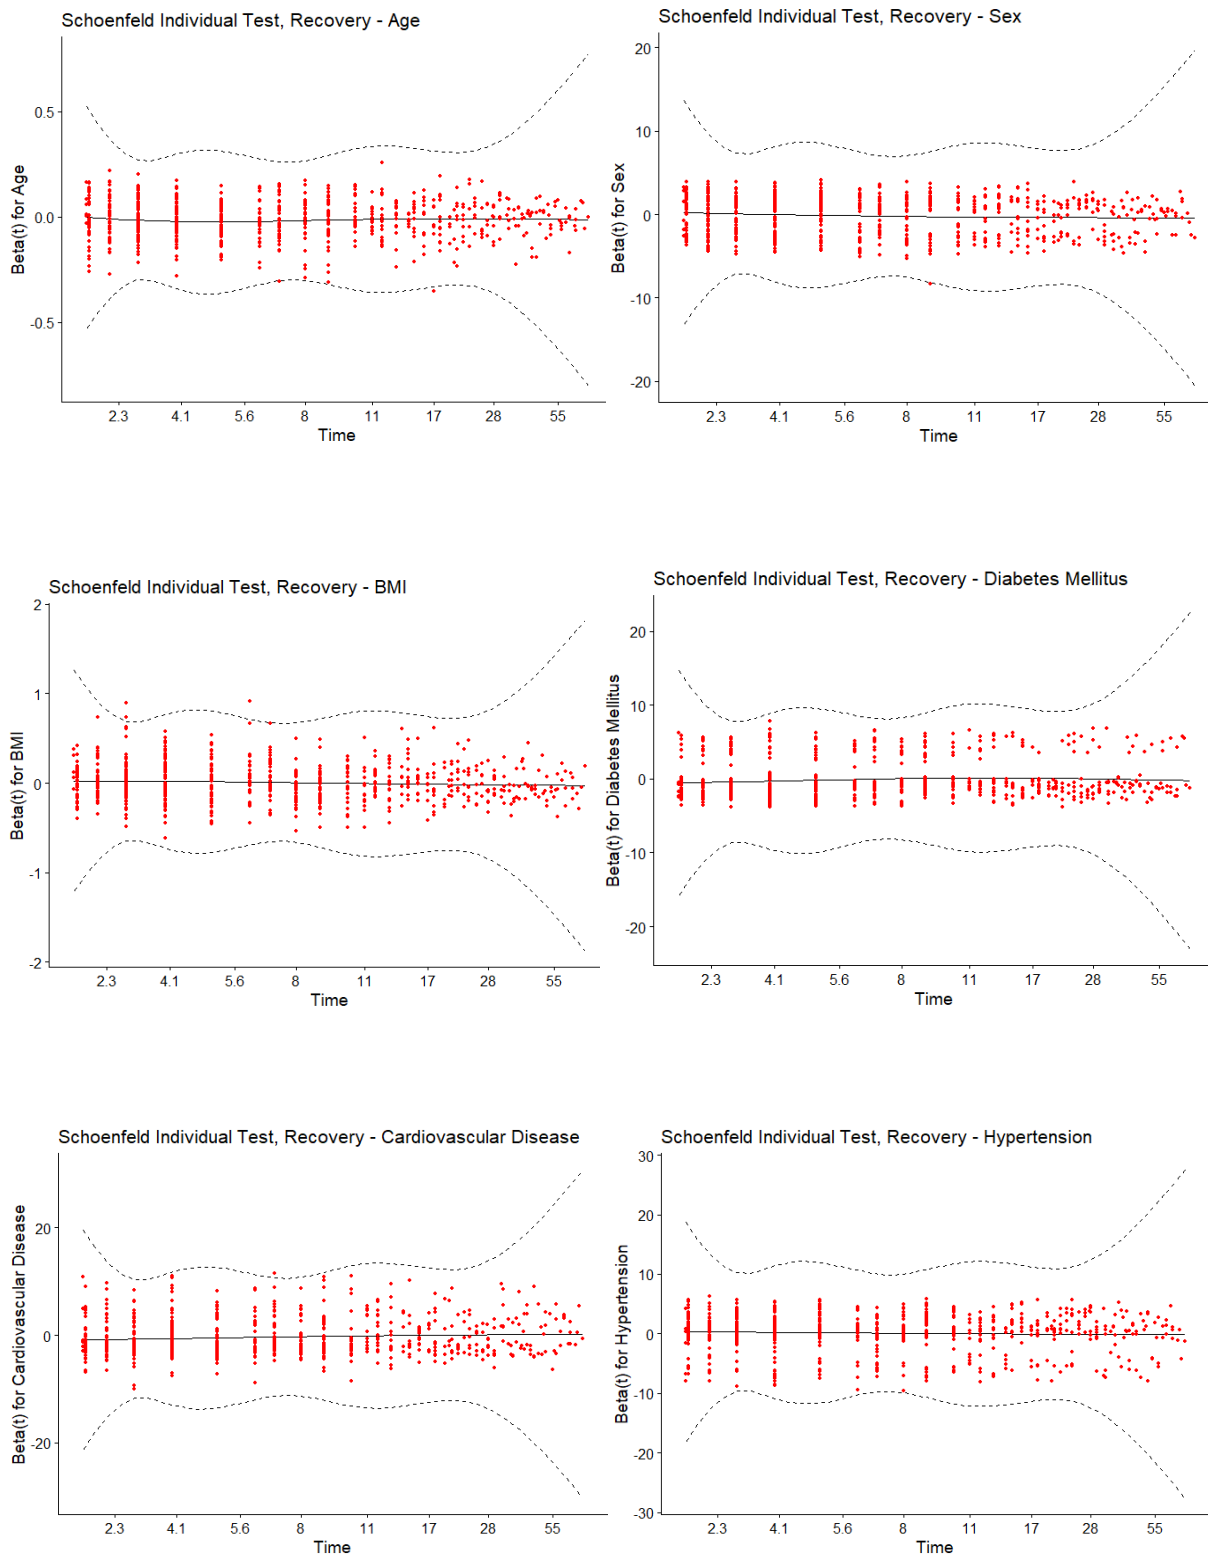

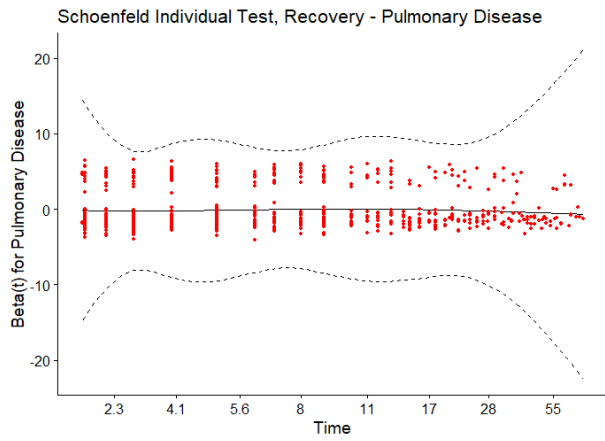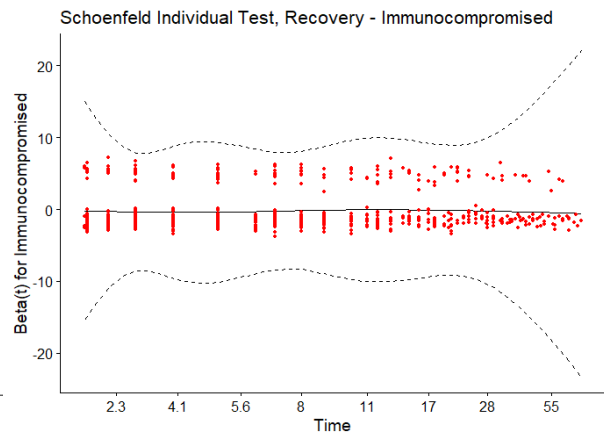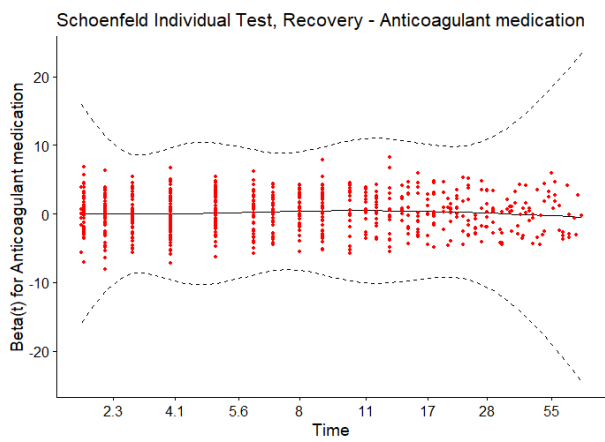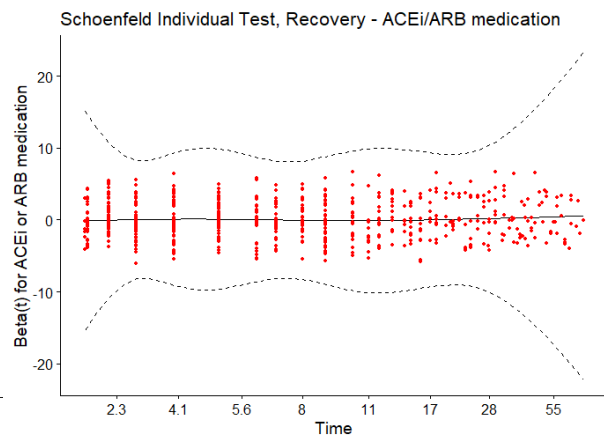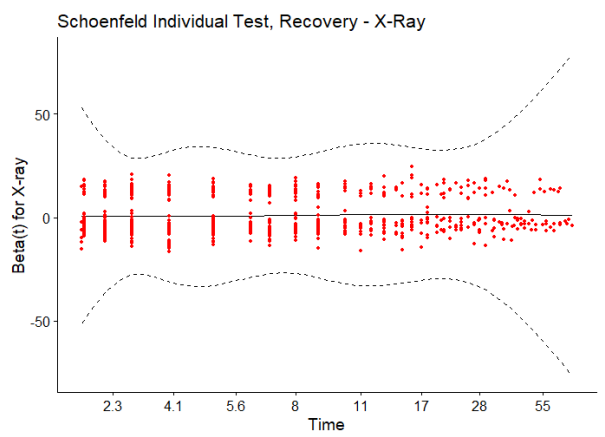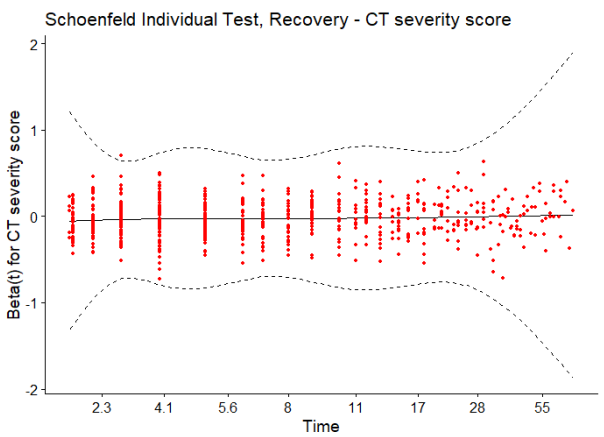

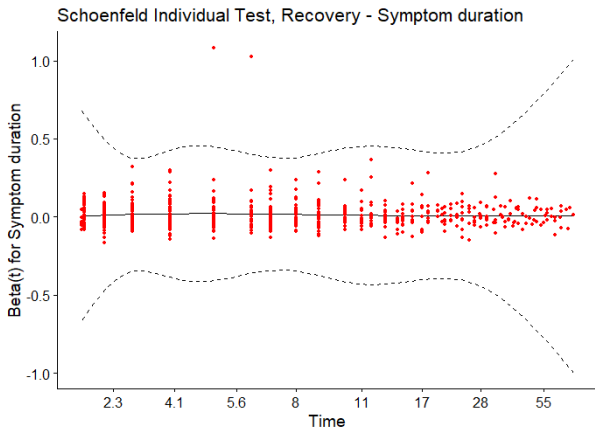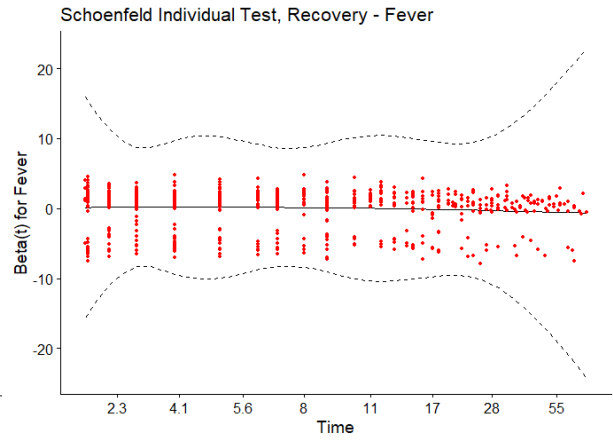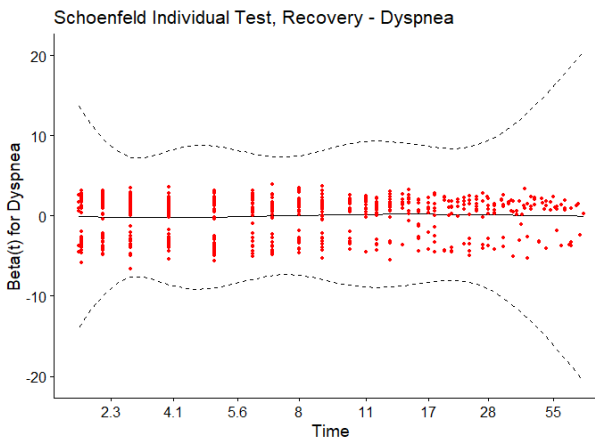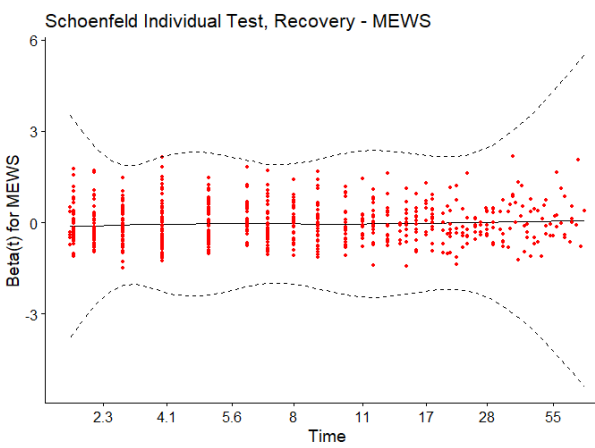

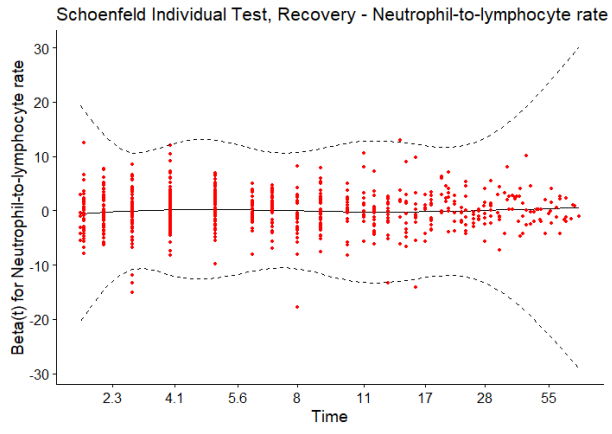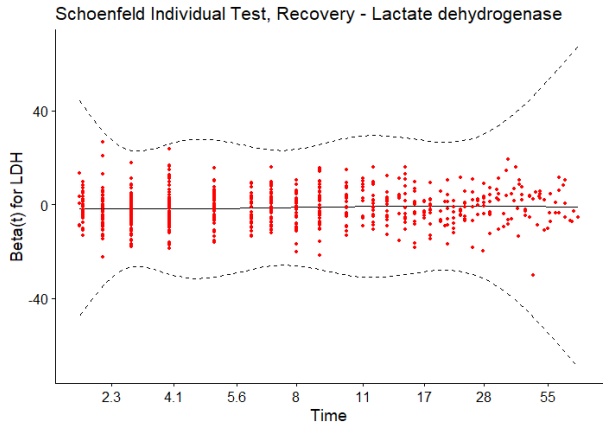



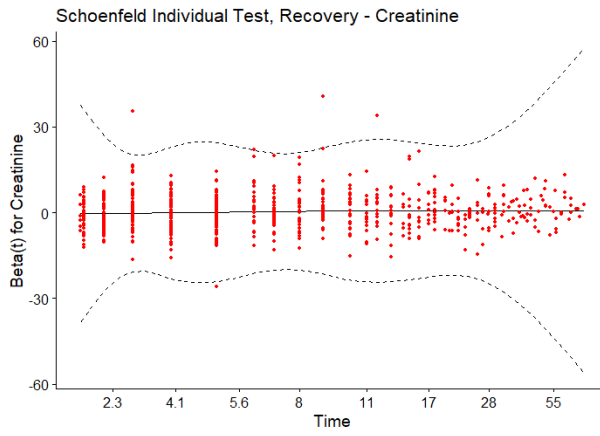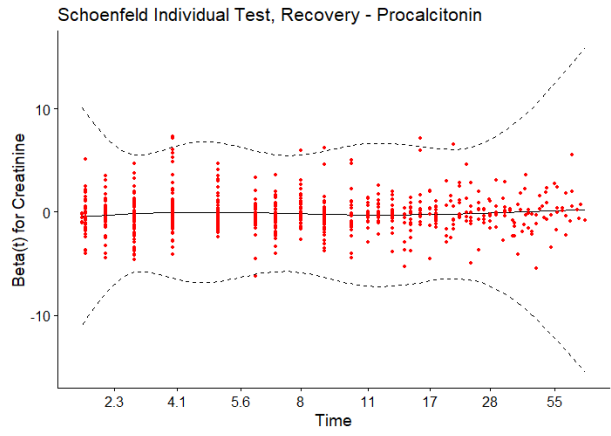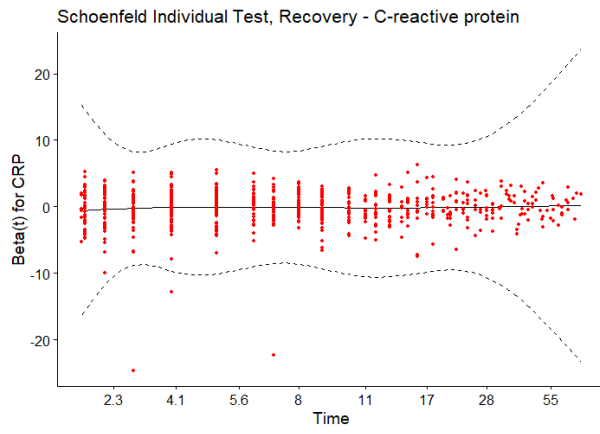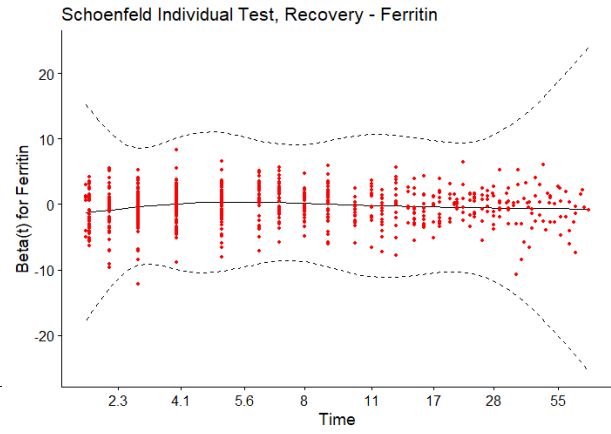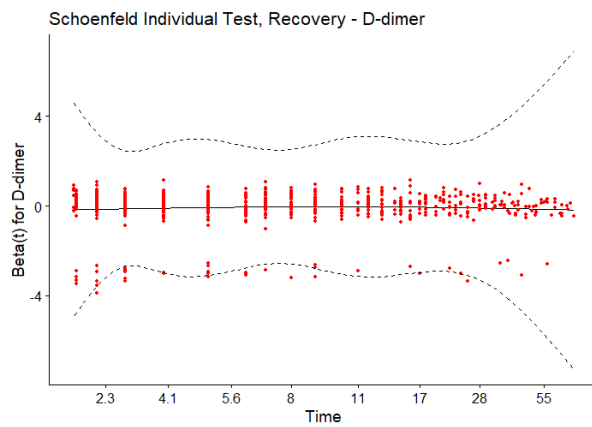

Supplement: pone.0249231.s003.pdf [file pone.0249231.s003.pdf]
